# Supplementary material
Source: PubMed Central journal article supplement (PMC5540176)

**A**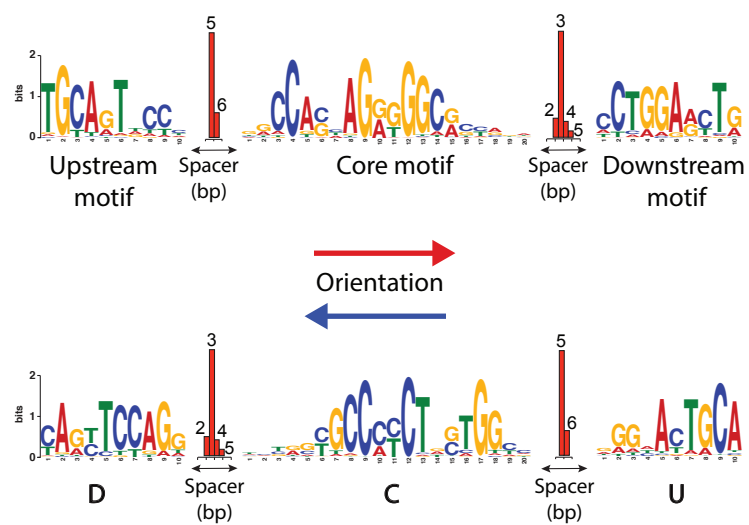**B**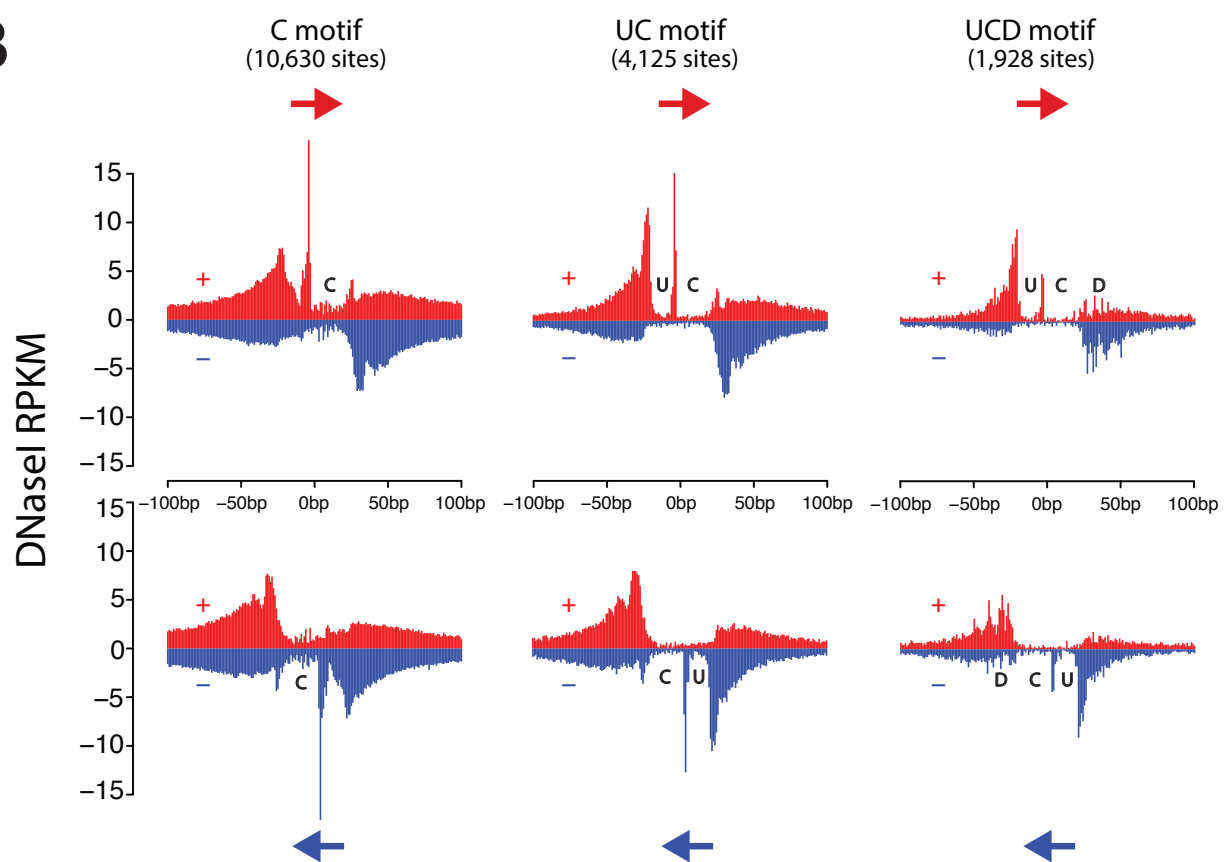**C**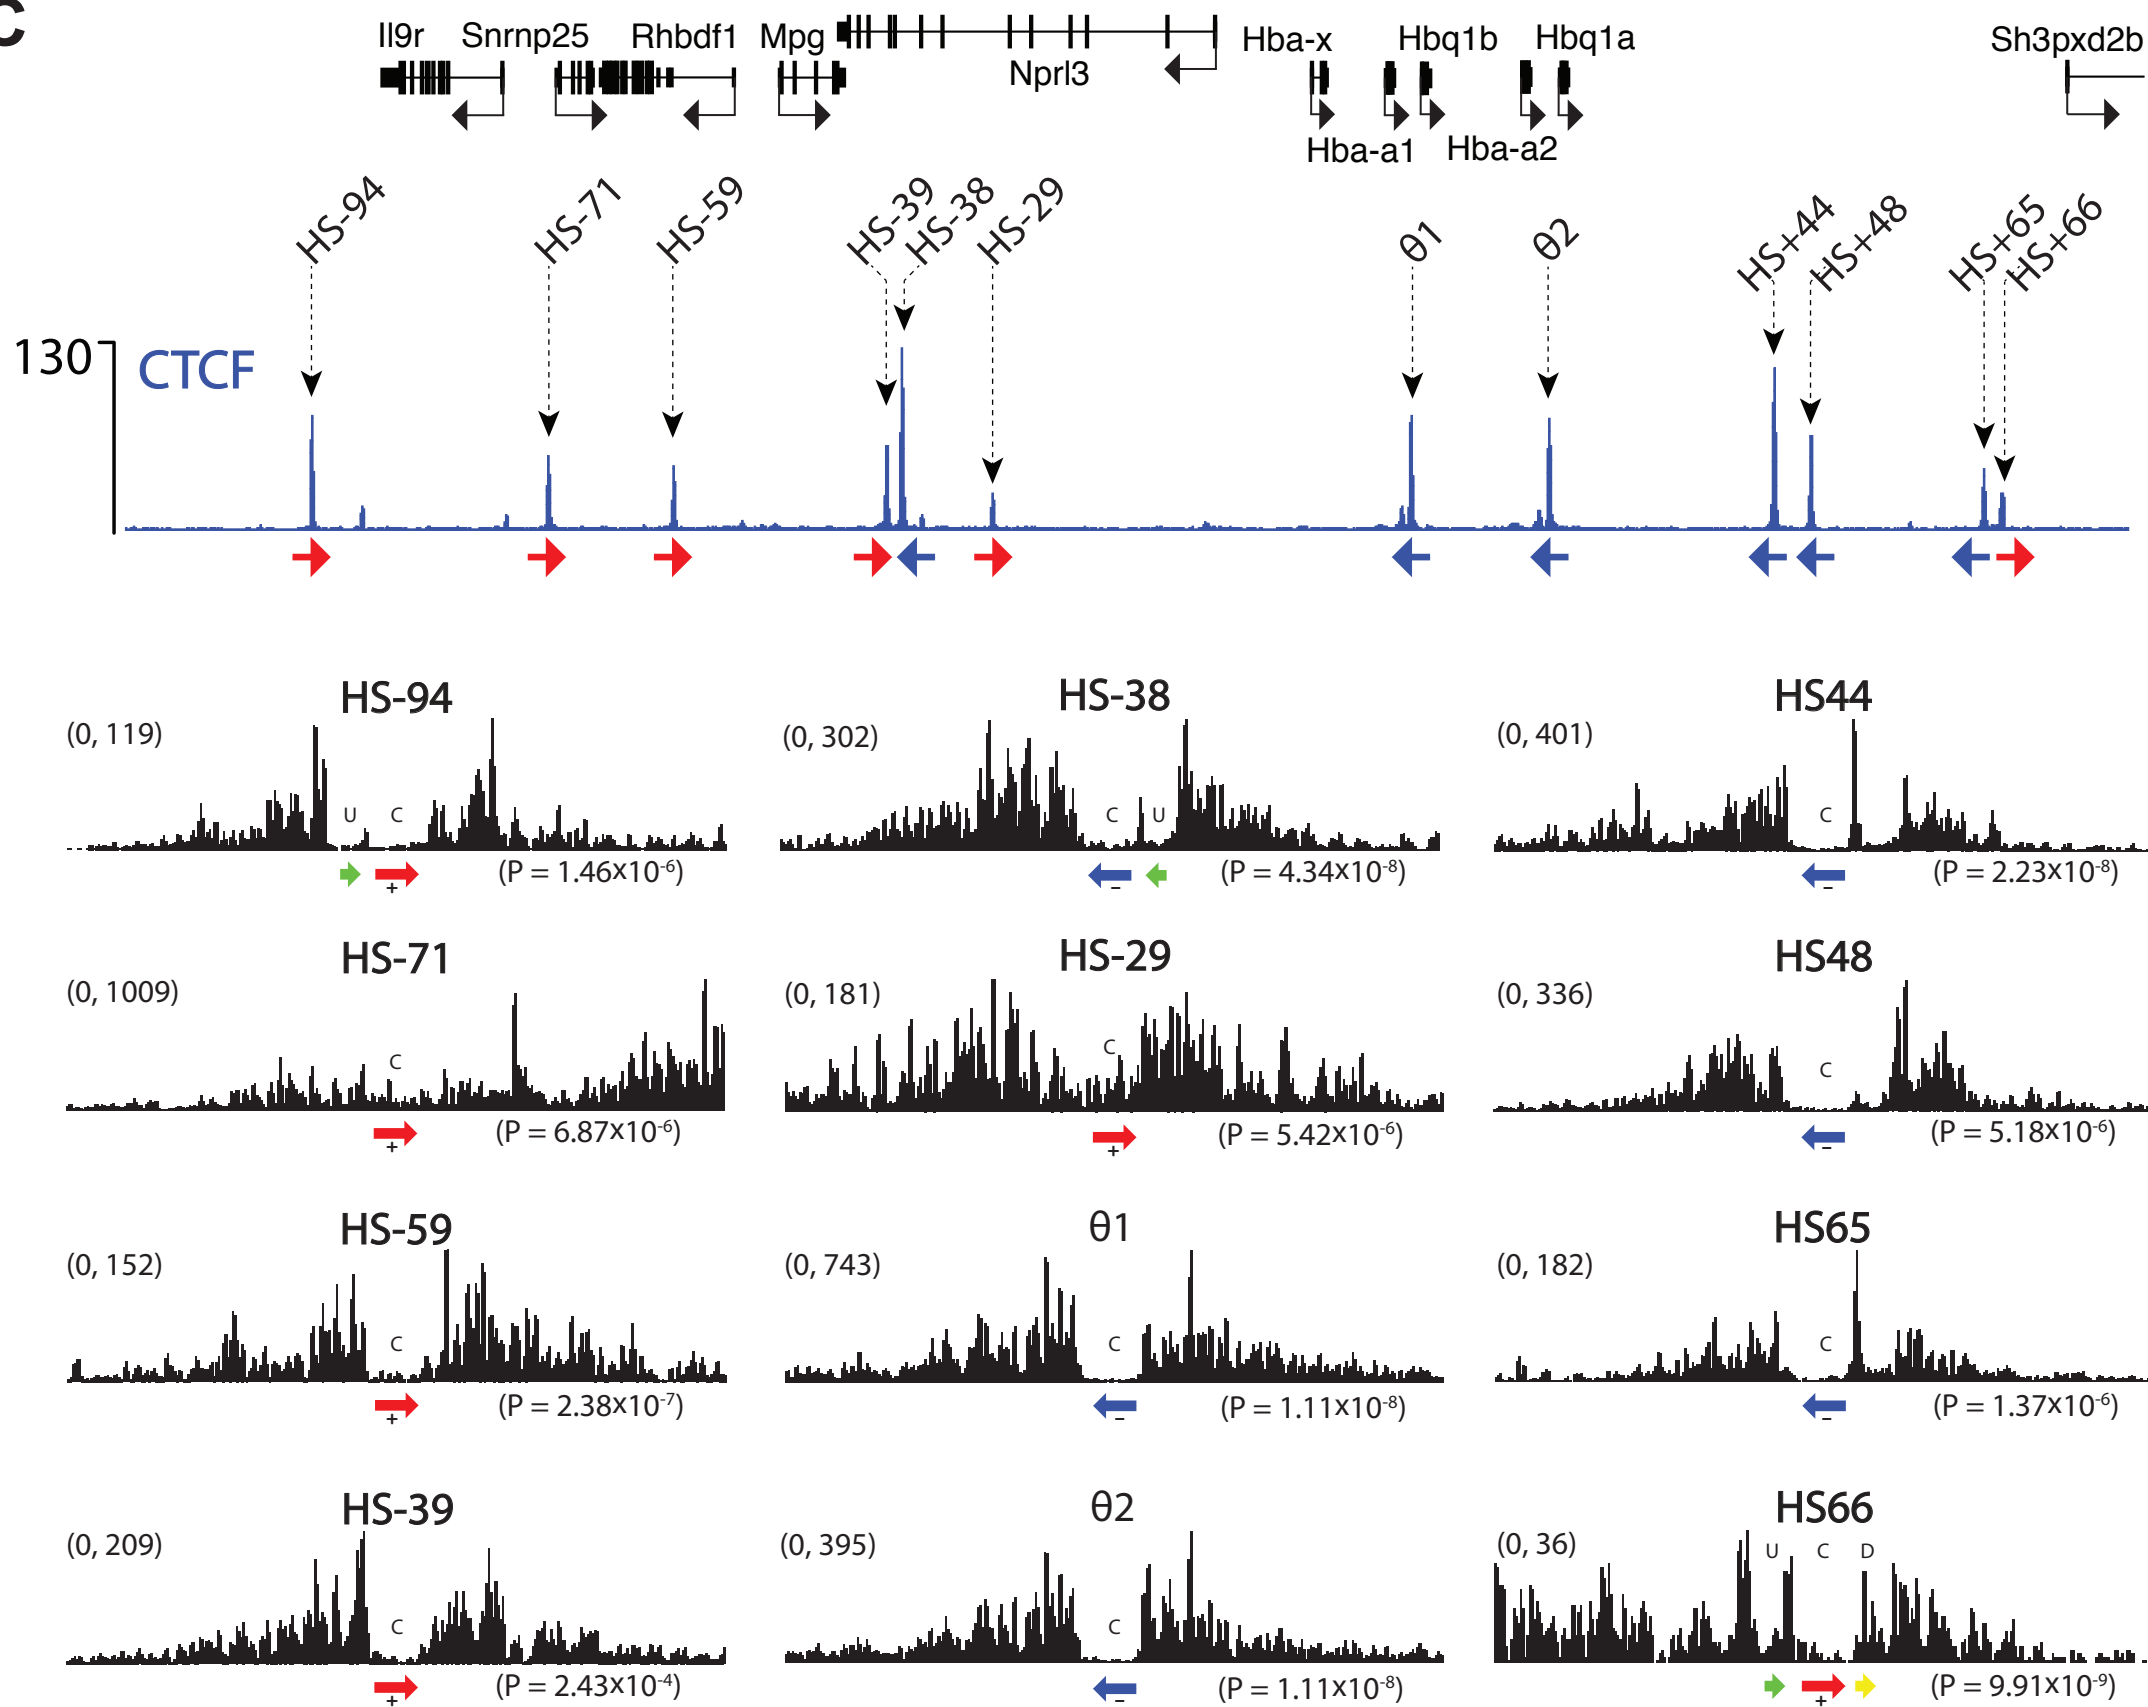

Supplement: NIHMS73118-supplement-Supplementary_Figure_1.pdf [file NIHMS73118-supplement-Supplementary_Figure_1.pdf]

D38

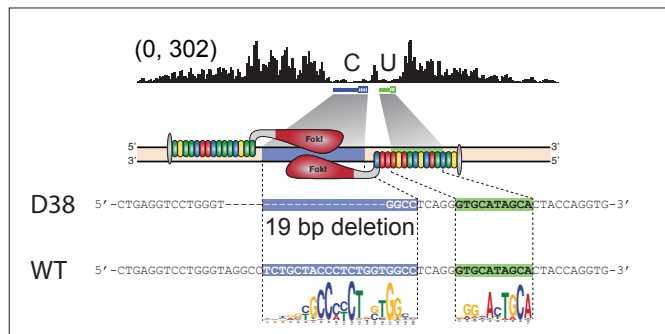

D3839

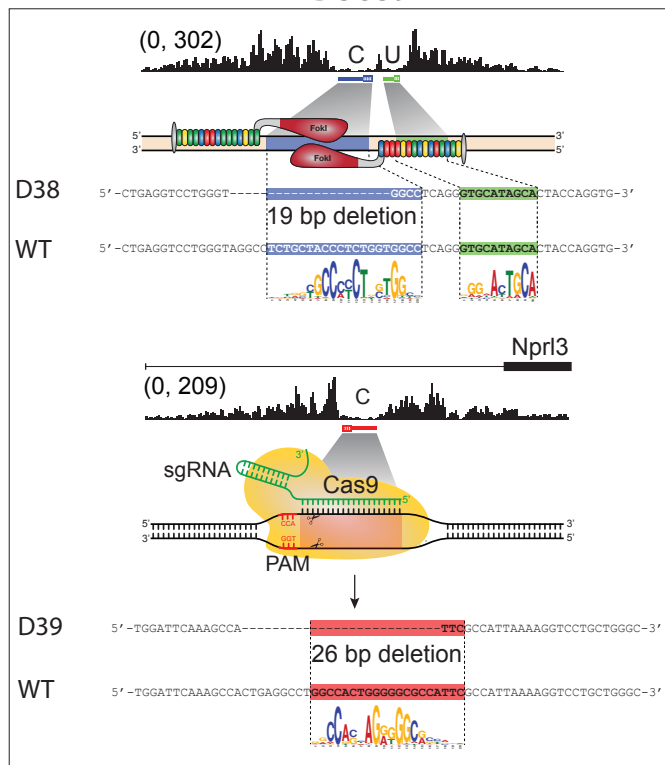

D39

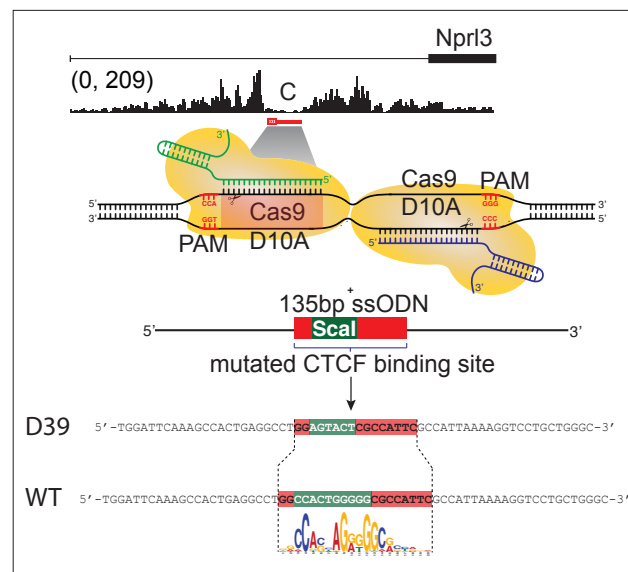

D29

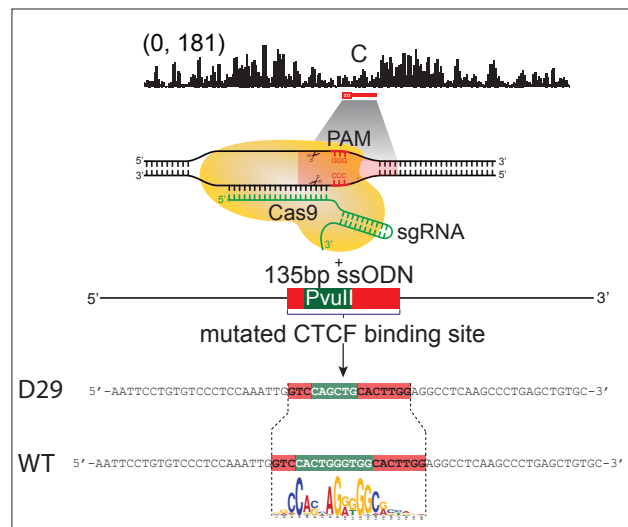

Supplement: NIHMS73118-supplement-Supplementary_Figure_2.pdf [file NIHMS73118-supplement-Supplementary_Figure_2.pdf]

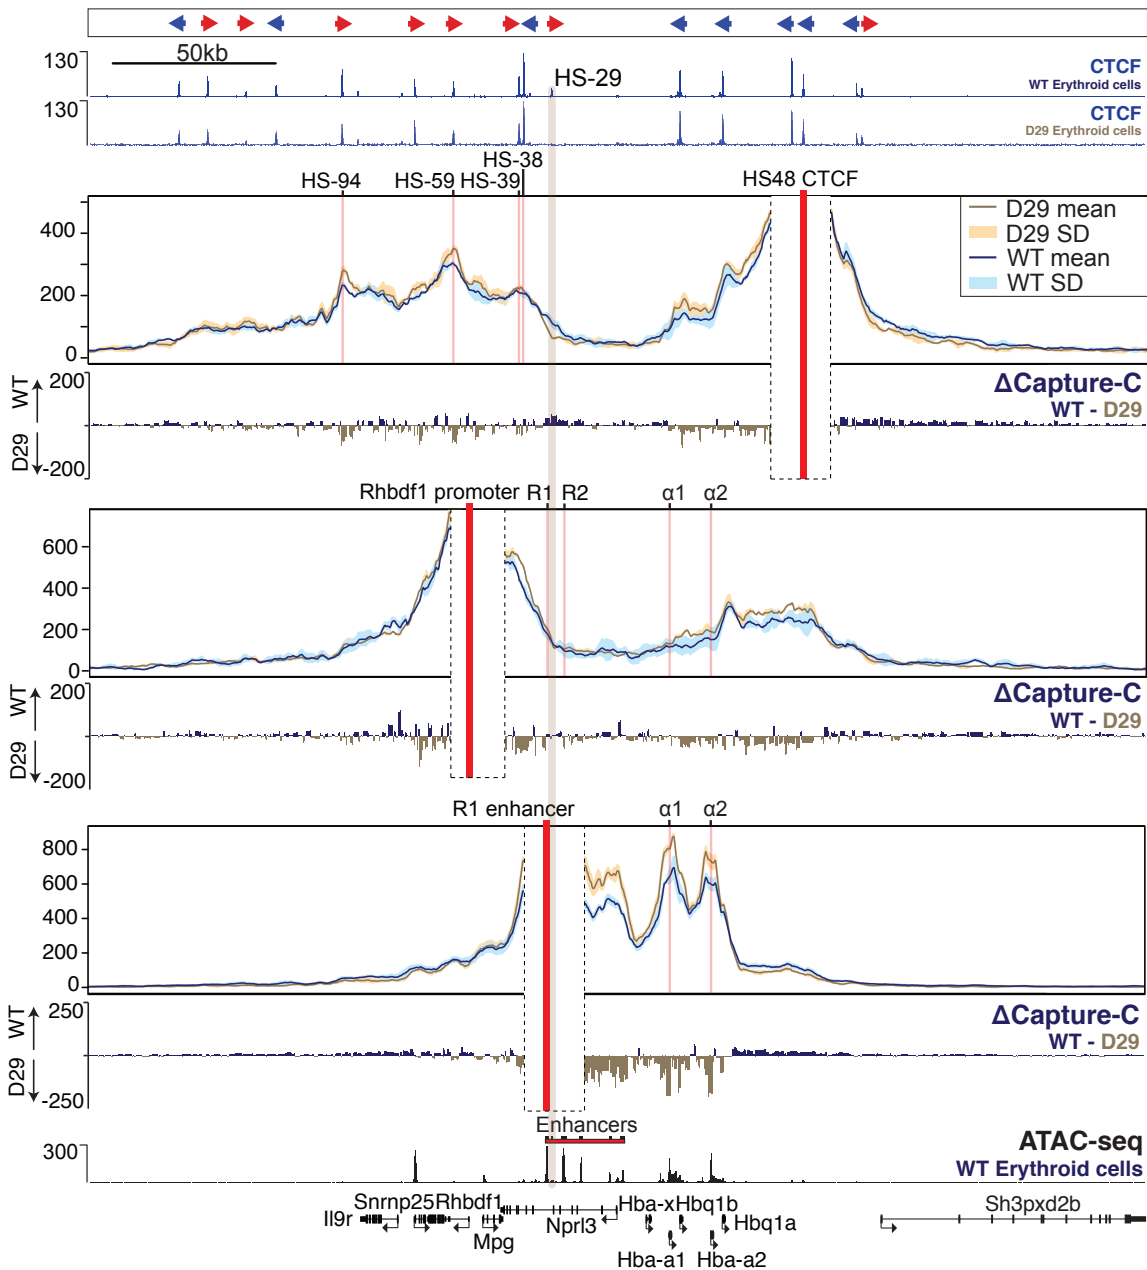

Supplement: NIHMS73118-supplement-Supplementary_Figure_3.pdf [file NIHMS73118-supplement-Supplementary_Figure_3.pdf]

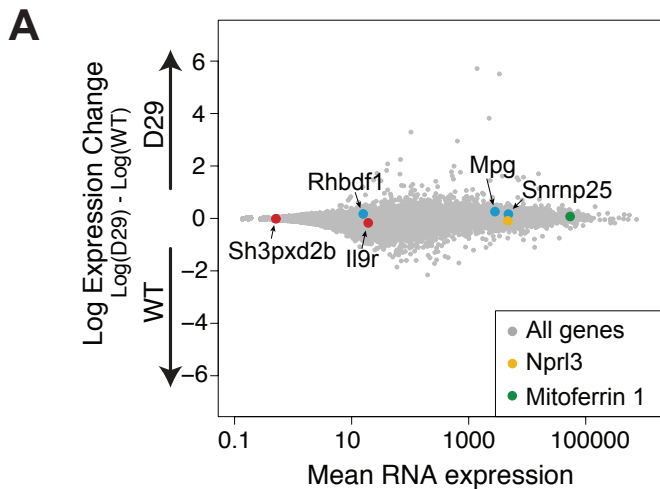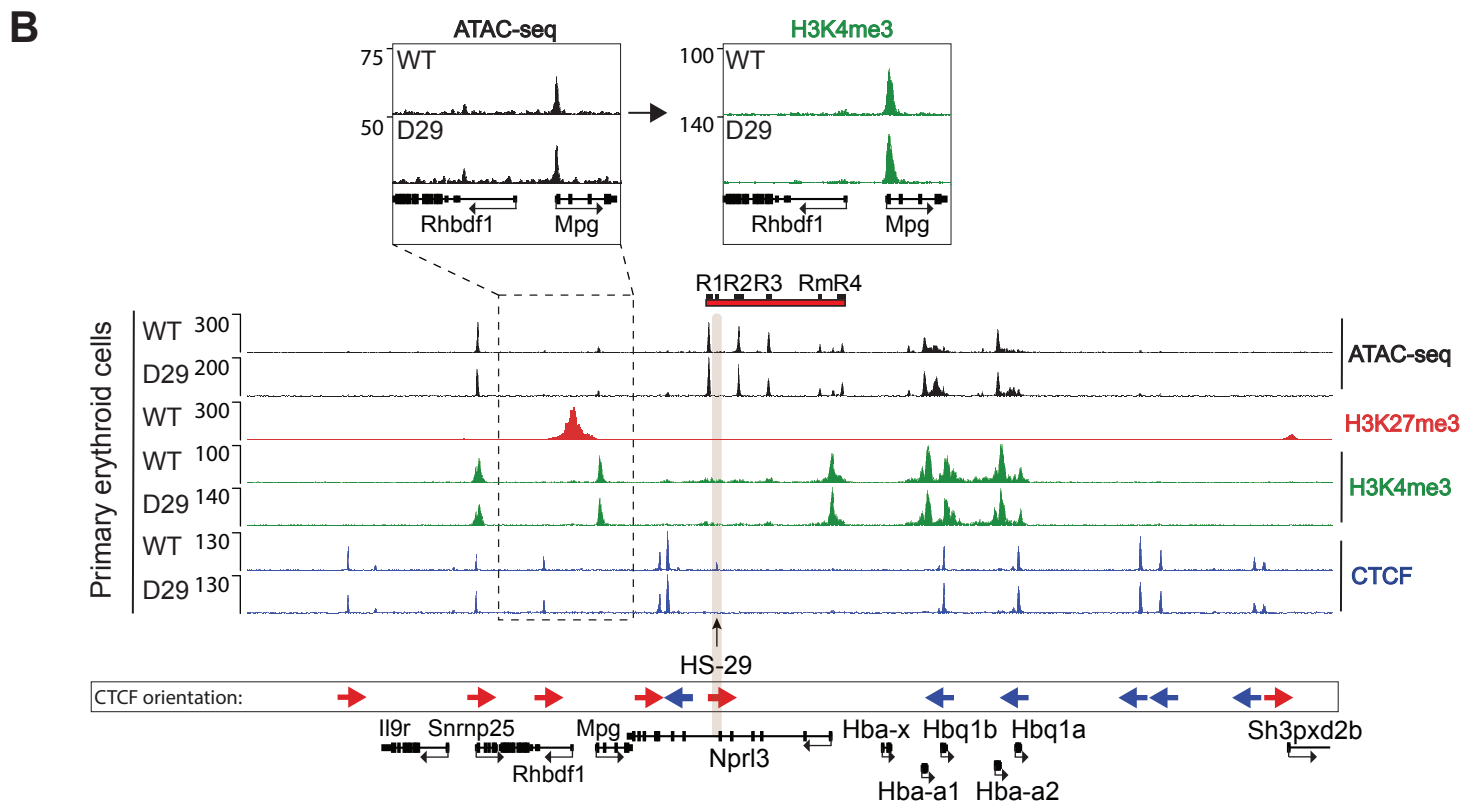

Supplement: NIHMS73118-supplement-Supplementary_Figure_4.pdf [file NIHMS73118-supplement-Supplementary_Figure_4.pdf]

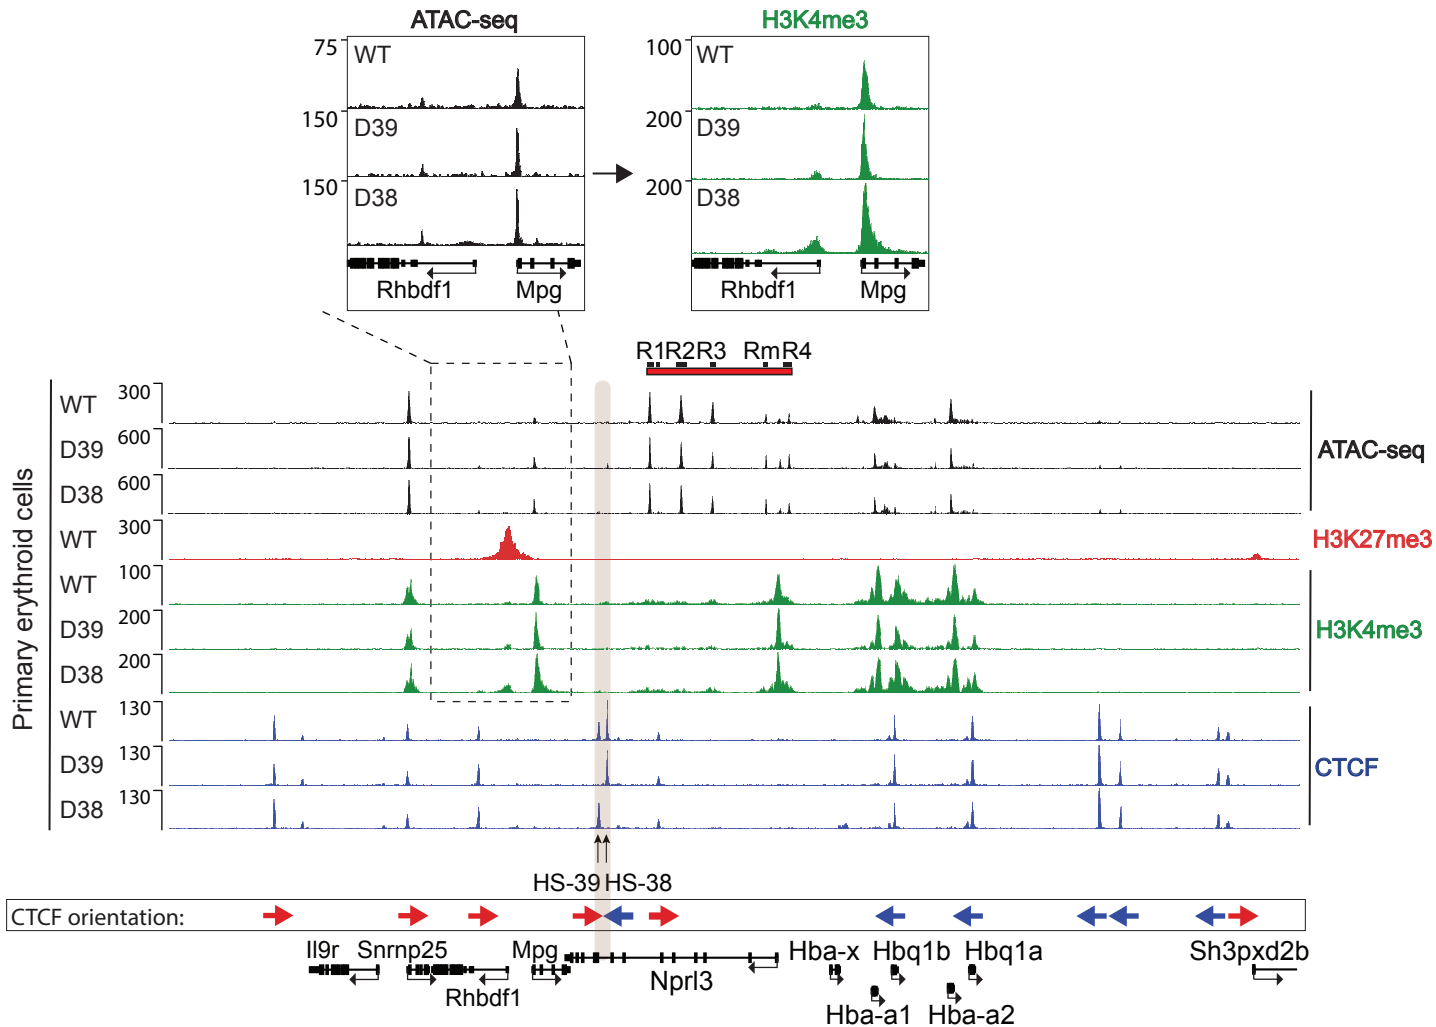

Supplement: NIHMS73118-supplement-Supplementary_Figure_5.pdf [file NIHMS73118-supplement-Supplementary_Figure_5.pdf]
